# Supplementary material for: Cloning and expression of Aspergillus flavus urate oxidase in Pichia pastoris
Source: PubMed Central journal article supplement (PMC4124111; doi:10.1186/2193-1801-3-395), 2014-07-30
Supplement: 40064_2014_1090_MOESM1_ESM.pdf [file 40064_2014_1090_MOESM1_ESM.pdf]

CLUSTAL O(1.2.1) multiple sequence alignment

|           |                                                                                                                         |     |
|-----------|-------------------------------------------------------------------------------------------------------------------------|-----|
| original  | ATGTCCGCAGTAAAAGCAGCCCGCTACGGCAAGGACAATGTCCGCGTCTACAAGGTTTCAC                                                           | 60  |
| optimized | ATGTCTGCCGTCAAAGCTGCCAGATACGGTAAAGACAATGTCTAGAGTTTACAAAGTCCAT<br>***** ** * ***** ** * ***** ** ***** * ** ***** ** *   | 60  |
| original  | AAGGACGAGAAGACCGGTGTCCAGACGGTGTACGAGATGACCGTCTGTGTGCTTCTGGAG                                                            | 120 |
| optimized | AAGGACGAAAAGACTGGTGTCCAGACCGTTTACGAAATGACTGTCTGCGTCTTGTGGAG<br>***** ***** ***** ** ***** ***** ***** ** * *****        | 120 |
| original  | GGTGAGATTGAGACCTTTACACCAAGGCCGACAACAGCGTCATTGTGCAACCGACTCC                                                              | 180 |
| optimized | GGTGAAATCGAACTTCTTACACAAAGGCCGATAATTCTGTTCATCGTTGCCACTGACTCT<br>***** ** ** * ***** ***** ** ***** ** ** ** *****       | 180 |
| original  | ATTAAGAACACCATTTACATCACCGCCAAGCAGAACCCCGTTACTCCTCCCGAGCTGTTT                                                            | 240 |
| optimized | ATCAAGAACACCATCTACATCACCGCTAAACAGAACCCAGTTACCCACCTGAGTTGTTT<br>** ***** ***** ** ***** ***** ***** ** ** ** *****       | 240 |
| original  | GGCTCCATCCTGGGCACACACTTCATTGAGAAGTACAACCACATCCATGCCGCTCACGTC                                                            | 300 |
| optimized | GGTTCTATCTTGGGTACTCACTTCATTGAGAAATACAACCACATCCATGCCGCCACGTT<br>** ** ** * ** ***** ***** ***** ***** ***** *****        | 300 |
| original  | AACATTGTCTGCCACCGCTGGACCCGGATGGACATTGACGGCAAGCCACACCCTCACTCC                                                            | 360 |
| optimized | AATATCGTCTGTACAGATGGACAAGAATGGACATCGACGGAAAGCCTCATCTCACTCT<br>** ** ***** ** * ***** * ***** ***** ***** ** *****       | 360 |
| original  | TTCATCCGCGACAGCGAGGAGAAGCGGAATGTGCAGGTGGACGTGGTTCGAGGGCAAGGGC                                                           | 420 |
| optimized | TTCATCAGAGACTCTGAGGAGAAAAGAAATGTCCAAGTCGACGTTGTTCGAGGGTAAGGGA<br>***** * ** ***** * ***** ** ** ***** ***** *****       | 420 |
| original  | ATCGATATCAAGTCGTCTCTGTCCGGCCTGACCGTGCTGAAGAGCACCAACTCGCAGTTC                                                            | 480 |
| optimized | ATTGACATTAAGTCTTCTTTGTCTGGATTGACAGTCTTGAAGTCTACAAATTCTCAGTTT<br>** ** * ***** ** ***** ** ***** ** ***** ** ** ** ***** | 480 |
| original  | TGGGGCTTCCTGCGTGACGAGTACACCACACTTAAGGAGACCTGGGACCGTATCCTGAGC                                                            | 540 |
| optimized | TGGGGTTTCTTGAGAGATGAATACACAACCTTGAAGGAAACCTGGGATAGAATCTTGTCT<br>***** ** * ** * ** ***** ** * ***** ***** ***** * ** ** | 540 |
| original  | ACCGACGTCGATGCCACTTGGCAGTGAAGAATTTTCAGTGGACTCCAGGAGGTCCGCTCG                                                            | 600 |
| optimized | ACCGATGTTGACGCCACTTGGCAATGAAGAACTTTTCTGGTTTGCAGGAGGTGAGATCT<br>***** ** * ***** ***** ***** ** ***** * ***** ** **      | 600 |
| original  | CACGTGCCTAAGTTCGATGCTACCTGGGCCACTGCTCGCGAGGTCACTCTGAAGACTTTT                                                            | 660 |
| optimized | CACGTTCCTAAGTTCGATGCCACATGGGCAACCGCCAGAGAGGTCACTTTGAAAACTTT<br>***** ***** ***** ** ***** ** ** * ***** ***** *****     | 660 |
| original  | GCTGAAGATAACAGTGCCAGCGTGCAGGCCACTATGTACAAGATGGCAGAGCAAATCCTG                                                            | 720 |
| optimized | GCCGAAGATAACTCTGCCTCTGTTCAGCAACCATGTACAAAATGGCCGAGCAGATCTTG<br>** ***** ***** ** ** ** ** ***** ***** ***** ***** ** ** | 720 |
| original  | GCGCGCCAGCAGCTGATCGAGACTGTCGAGTACTCGTTGCCTAACCAAGCACTATTTGAA                                                            | 780 |
| optimized | GCTAGACAGCAGTTGATTGAAACCGTCGAATACTCTTGCCTAACCAACTACTTCGAG<br>** * ***** ***** ** ** ***** ***** ***** ***** *****       | 780 |
| original  | ATCGACCTGAGCTGGCACAAGGGCTCCAAAACACCGGCAAGAACGCCGAGGTCTTCGCT                                                             | 840 |

6/4/2010 [www.ebi.ac.uk/Tools/services/rest/clustalo/result/clustalo-I20140604-133149-0736-96495142-oy/aln-clustal\\_num](http://www.ebi.ac.uk/Tools/services/rest/clustalo/result/clustalo-I20140604-133149-0736-96495142-oy/aln-clustal_num)

|           |                                                               |     |
|-----------|---------------------------------------------------------------|-----|
| optimized | ATTGACTTGTCTTGGCACAAGGGTTTGCAGAACACTGGAAAGAATGCAGAGGTTTTTCGCT | 840 |
|           | ** *** * ***** * ** ***** ** ***** ** ***** *****             |     |
| original  | CCTCAGTCGGACCCCAACGGTCTGATCAAGTGTACCGTCGGCCGGTCCTCTCTGAAGTCT  | 900 |
| optimized | CCACAGTCTGACCCAAACGGTTTGGATTAAGTGCACCGTTGGTAGATCTTCTTTGAAGTCT | 900 |
|           | ** ***** ***** ***** ***** ***** ***** ** * ** *** *****      |     |
| original  | AAATTGT 907                                                   |     |
| optimized | AAGTTGC 907                                                   |     |
|           | ** ***                                                        |     |
